# Supplementary material
Source: publisher site journal article supplement (https://www.spandidos-publications.com/3404/downloadSupplementary)
Supplement: Supplementary file 1 [file downloadSupplementary]

## Sheet: Table S2
Table SII. miRNAs that may target circTADA2A, predicted by Cicular RNA Interactome.
circRNA	circRNA (top) - miRNA (bottom) pairing	Site type	circRNA start	circRNA end	3' pairing	Local AU	Position	TA	SPS	Context+ score	Context+ score percentile
Mirbase ID
hsa_circ_0043278 (5' ... 3')	AGACCAAGGAGGAGU---GUGAGAAG	7mer-1a	137	143	-0.009	0.028	-0.038	0.001	-0.021	-0.113	86
	||||| ||||||
hsa-miR-1229 (3' ... 5')	GACACCCUCCCGUCACCACUCUC
hsa_circ_0043278 (5' ... 3')	AAGCACUAUAUGAAGCAUUUCAU	7mer-m8	157	163	0.021	-0.009	-0.049	0.031	0.068	-0.058	94
	|||||||
hsa-miR-203 (3' ... 5')	GAUCACCAGGAUUUGUAAAGUG
hsa_circ_0043278 (5' ... 3')	CUGACACAGCCAUUCCAUUUCAC	7mer-m8	242	248	0.003	0.031	-0.061	0.031	0.068	-0.048	94
	|||||||
hsa-miR-203 (3' ... 5')	GAUCACCAGGAUUUGUAAAGUG
hsa_circ_0043278 (5' ... 3')	AAGGAGGAGUGUGAGAAGCACUA	8mer-1a	142	149	0.024	0.021	-0.089	-0.008	0.001	-0.298	98
	|||||||
hsa-miR-520f (3' ... 5')	UUGGGAGAUUUUCCUUCGUGAA
hsa_circ_0043278 (5' ... 3')	GAUUUUCCUGUCCUUGAUCCCAG	7mer-m8	22	28	0.003	0.009	-0.059	-0.011	-0.04	-0.218	93
	|||||||
hsa-miR-450b-3p (3' ... 5')	AUACCUACGUUUUACUAGGGUU
hsa_circ_0043278 (5' ... 3')	GAUUUUCCUGUCCUUGAUCCCAG	7mer-m8	22	28	0.003	0.009	-0.059	-0.011	-0.04	-0.218	93
	|||||||
hsa-miR-769-3p (3' ... 5')	UUGGUUCUGGGGCCUCUAGGGUC
hsa_circ_0043278 (5' ... 3')	AUCCCAGCUGGACUGCUCAAGAA	8mer-1a	38	45	0.003	0.062	-0.105	0.007	0.019	-0.261	97
	|||||||
hsa-miR-526b (3' ... 5')	UGUCUUUCACGAAGGGAGUUCUC
hsa_circ_0043278 (5' ... 3')	GAUUUUCCUGUCCUUGAUCCCAG	7mer-1a	22	28	0.001	0.022	-0.048	-0.038	-0.058	-0.195	90
	||||||
hsa-miR-638 (3' ... 5')	UCCGGCGGUGGGCGGGCGCUAGGGA
